# Supplementary material for: Comparison of Different Analytical Strategies for Classifying Invasive Wetland Vegetation in Imagery from Unpiloted Aerial Systems (UAS)
Source: MDPI journal article supplement (doi:10.3390/rs13234733), 2021-11-23
Supplement: s1 [file s1]

Archive with 1 entries (1 files):
- remotesensing-1434699-supplementary.pdf
